# Supplementary material
Source: PubMed Central journal article supplement (PMC4172555)

# Supplemental Figure 1

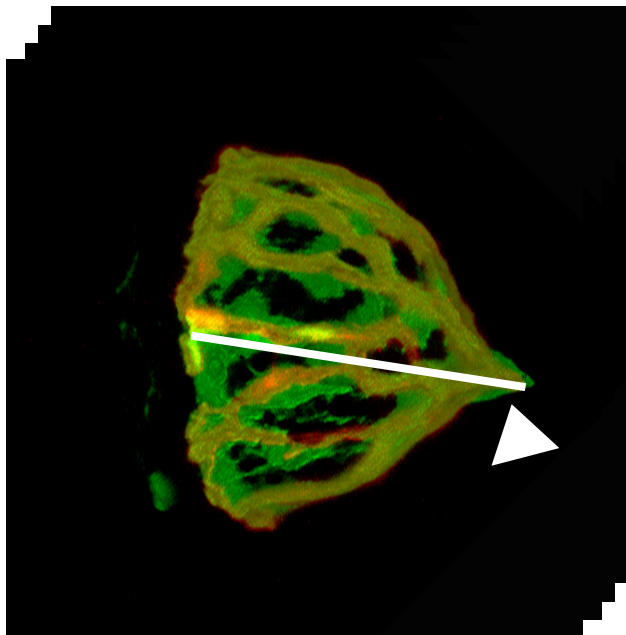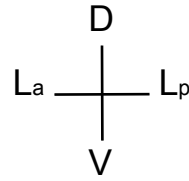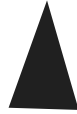

r = #optical slices

Supplement: NIHMS622474-supplement-1.pdf [file NIHMS622474-supplement-1.pdf]

# Supplemental Figure 2

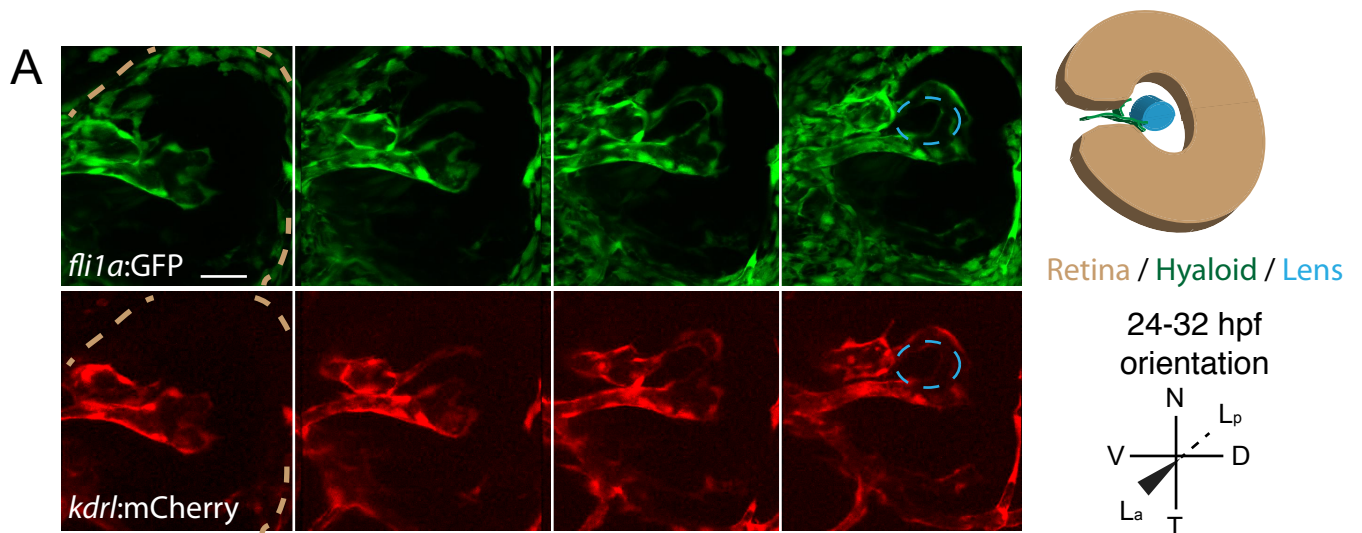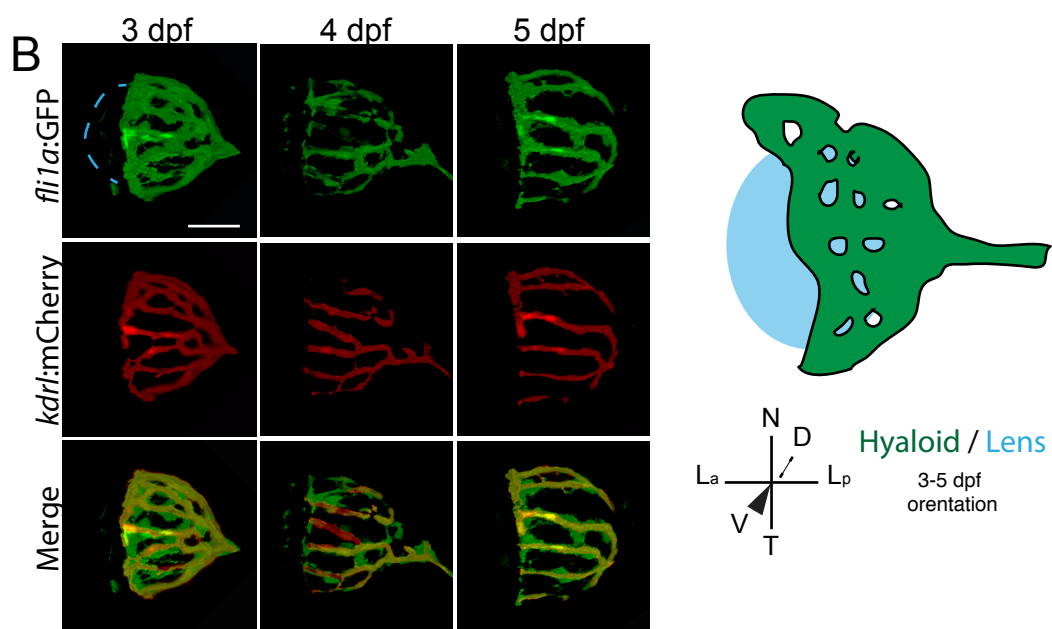

Supplement: NIHMS622474-supplement-2.pdf [file NIHMS622474-supplement-2.pdf]
